# Supplementary material for: Metformin inhibits testosterone-induced endoplasmic reticulum stress in ovarian granulosa cells via inactivation of p38 MAPK
Source: PubMed Central journal article supplement — Hum Reprod. 2020 May 6;35(5):1145–58. doi: 10.1093/humrep/deaa077 (PMC7259369; doi:10.1093/humrep/deaa077), 2020-05-06
Supplement: deaa077_suppl_fig1.pdf [file deaa077_suppl_fig1.pdf]

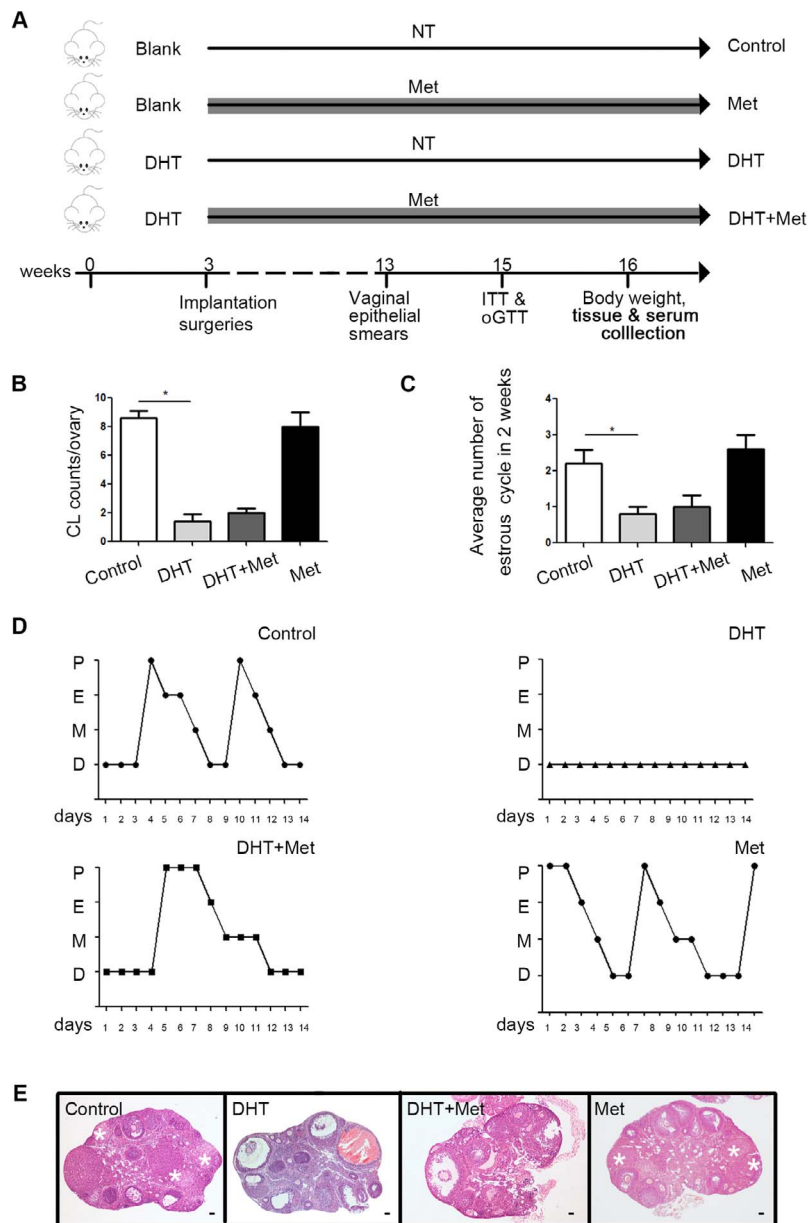

**Supplementary Figure S1** Study design and information on ovarian morphology, corpora lutea (CLs) and oestrous cycles in the different groups. **(A)** Experimental design. **(B)** Average numbers of CLs in individual ovaries at 13 weeks of age ( $n = 10$  per group).  $*P < 0.05$ . The data are presented as means  $\pm$  SEMs. **(C)** Oestrous cycles of female mice completed in a 2-week period at 13 weeks of age.  $*P < 0.05$ . The data are presented as means  $\pm$  SEMs ( $n = 10$  per group). **(D)** Oestrous cycle patterns in representative mice from the control, metformin, dihydrotestosterone (DHT)-treated and DHT- and metformin (met)-treated groups. **(E)** Representative images of haematoxylin-eosin staining of ovaries from each group. The white stars indicate CLs. Scale bar: 100  $\mu$ m. NT, no treatment; oGTT, oral glucose tolerance test; ITT, insulin tolerance test; P, pro-oestrus; E, oestrus; M, metoestrus; D, dioestrus.
