# Supplementary material for: Metformin inhibits testosterone-induced endoplasmic reticulum stress in ovarian granulosa cells via inactivation of p38 MAPK
Source: PubMed Central journal article supplement — Hum Reprod. 2020 May 6;35(5):1145–58. doi: 10.1093/humrep/deaa077 (PMC7259369; doi:10.1093/humrep/deaa077), 2020-05-06
Supplement: deaa077_suppl_fig2.pdf [file deaa077_suppl_fig2.pdf]

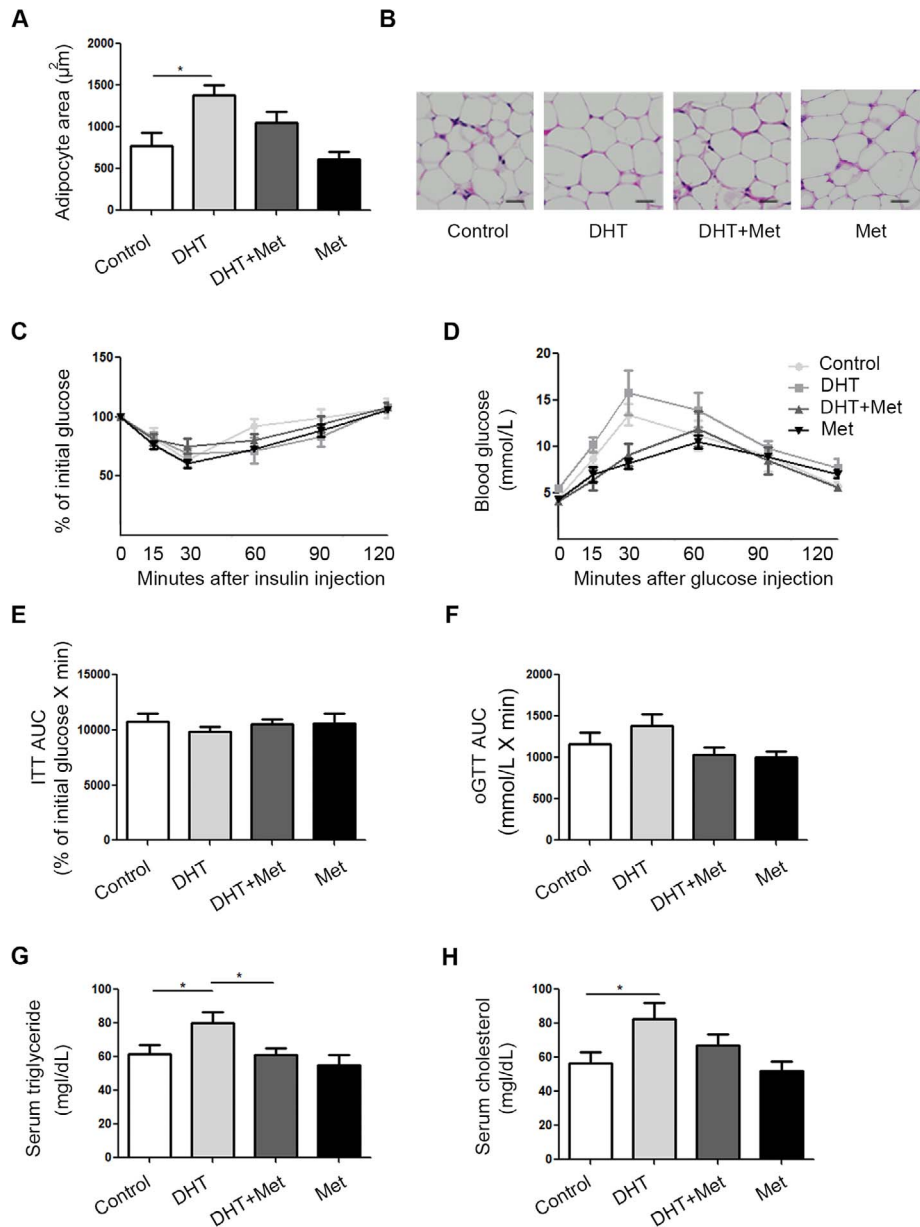

**Supplementary Figure S2** Metabolic indicators of mice in the control, metformin (met), dihydrotestosterone (DHT)-treated and DHT- and metformin-treated groups. **(A)** Adipocyte areas calculated with Imagej software. \* $P < 0.05$ . The data are presented as means  $\pm$  SEMs ( $n = 3$  sections per mouse, five mice per treatment group). **(B)** Histological sections of representative parametrial fat pads from each treatment group. Bar: 25  $\mu\text{m}$ . Insulin tolerance test (ITT) **(C)** and oral glucose tolerance test (oGTT) **(D)** results at 15 weeks of age.  $n = 5$  per group. Area under the curve (AUC) analysis of ITT **(E)** and oGTT **(F)** results calculated with GraphPad Prism 5 ( $n = 5$  per group, two-way ANOVA). Serum triglyceride levels **(G)** and serum cholesterol levels **(H)** in different groups at the age of 16 weeks. The data are presented as means  $\pm$  SEMs (\* $P < 0.05$ ,  $n = 10$  per treatment group).
