# Supplementary material for: Metformin inhibits testosterone-induced endoplasmic reticulum stress in ovarian granulosa cells via inactivation of p38 MAPK
Source: PubMed Central journal article supplement — Hum Reprod. 2020 May 6;35(5):1145–58. doi: 10.1093/humrep/deaa077 (PMC7259369; doi:10.1093/humrep/deaa077), 2020-05-06
Supplement: deaa077_suppl_fig4.pdf [file deaa077_suppl_fig4.pdf]

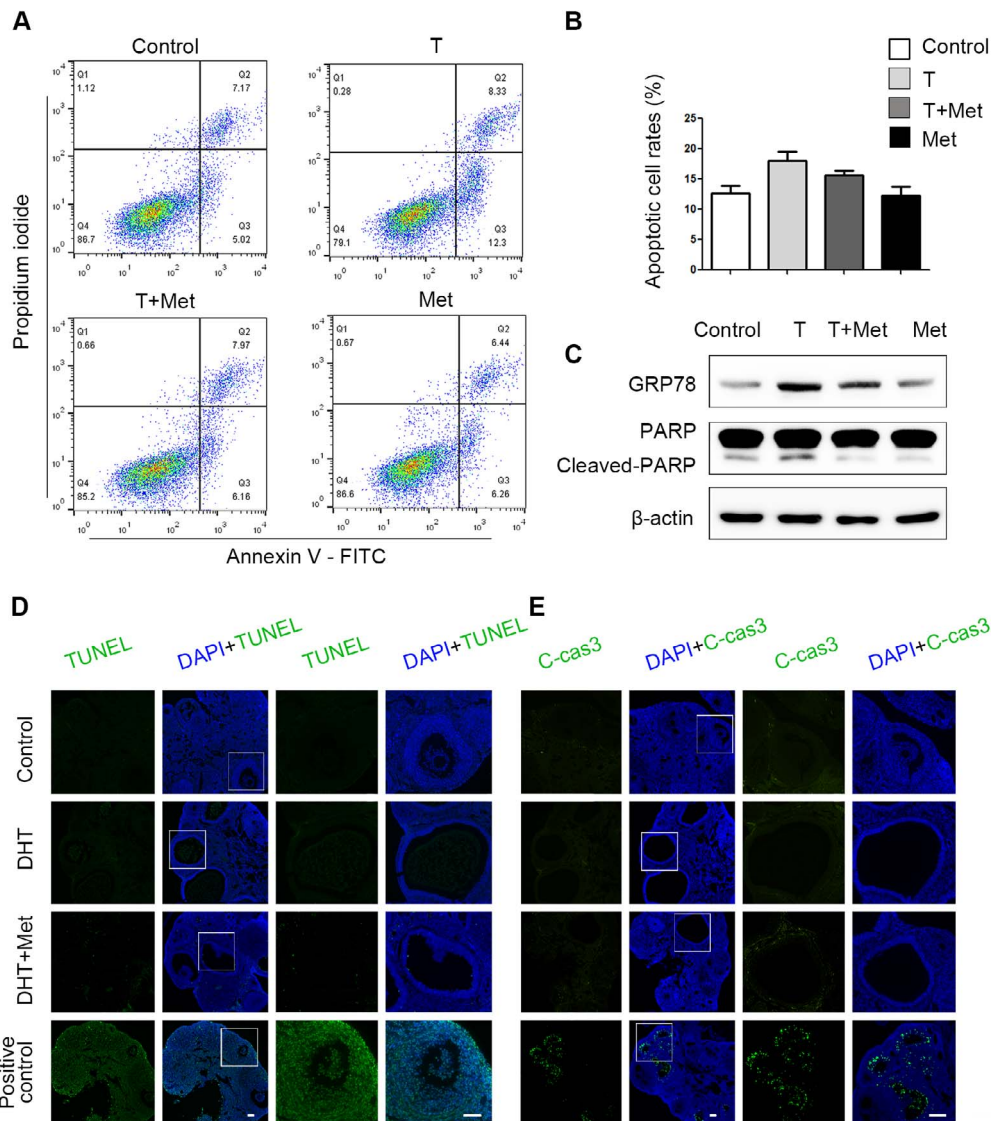

**Supplementary Figure S4 Analysis of apoptosis in testosterone-treated granulosa cells (GCs) and dihydrotestosterone (DHT)-induced polycystic ovary syndrome (PCOS) model mouse ovaries. (A)** FITC-Annexin V and propidium iodide (PI) staining of GCs and flow cytometry analysis of GC apoptotic rates after treatment with 10  $\mu$ M testosterone (T) for 24 h with or without 1 mM metformin (met). **(B)** Statistical analysis of the apoptosis rates of different groups compared to that of the control group. The data are presented as means  $\pm$  SEMs. **(C)** Western blot results of total PARP protein and cleaved PARP protein levels in GCs treated with 10  $\mu$ M testosterone with or without 1 mM metformin for 24 h. **(D)** TUNEL assay for apoptosis in ovarian antral follicles from the control, DHT-treated and DHT- and metformin-treated groups at 16 weeks of age. Slides with ovarian sections treated with DNase I for 30 min served as positive controls. DNA strand breaks were visualized by detecting fluorescein-dUTP signals. Nuclei were stained with DAPI. Scale bar: 100  $\mu$ m. **(E)** Immunofluorescence (IF) results for cleaved caspase 3 in ovarian antral follicles from the different groups at 16 weeks of age. The positive control samples were from the ovaries of mice injected with 120 mg/kg cyclophosphamide for 72 h. Nuclei were stained with DAPI. Scale bar: 100  $\mu$ m. C-cas 3, cleaved-caspase 3.
