# Supplementary material for: Metformin inhibits testosterone-induced endoplasmic reticulum stress in ovarian granulosa cells via inactivation of p38 MAPK
Source: PubMed Central journal article supplement — Hum Reprod. 2020 May 6;35(5):1145–58. doi: 10.1093/humrep/deaa077 (PMC7259369; doi:10.1093/humrep/deaa077), 2020-05-06
Supplement: deaa077_suppt1.pdf [file deaa077_suppt1.pdf]

**Supplementary Table S1** Primer sequences.

| Gene    | Species | Direction | Sequence (5'–3')        |
|---------|---------|-----------|-------------------------|
| GRP78   | Human   | Forward   | AAGAACCAGCTCACCTCCAACCC |
|         |         | Reverse   | TTCAACCACCTTGAACGGCAA   |
| XBPIs   | Human   | Forward   | TGCTGAGTCCGCAGCAGGTG    |
|         |         | Reverse   | GCTGGCAGGCTCTGGGGAAG    |
| CHOP    | Human   | Forward   | GGAAACAGAGTGGTCATTCCC   |
|         |         | Reverse   | CTGCTTGAGCCGTTCACTTC    |
| ATF4    | Human   | Forward   | ATGACCAGAAATGAGCTTCCTG  |
|         |         | Reverse   | GCTGGAGAACCCATGAGGT     |
| GAPDH   | Human   | Forward   | CGCATCTTCTTTTGCGTCG     |
|         |         | Reverse   | TTGAGGTCAATGAAGGGGTCA   |
| GRP78   | Mouse   | Forward   | GACTGCTGAGGCGTATTTGG    |
|         |         | Reverse   | AGCATCTTTGGTTGCTTGTCG   |
| XBPIs   | Mouse   | Forward   | TGCTGAGTCCGCAGCAGGTG    |
|         |         | Reverse   | ACTAGCAGACTCTGGGGAAG    |
| XBPIu   | Mouse   | Forward   | CAGCACTCAGACTATGTGCA    |
|         |         | Reverse   | GTCCATGGGAAGATGTTCTGG   |
| CHOP    | Mouse   | Forward   | AAGCCTGGTATGAGGATCTGC   |
|         |         | Reverse   | TTCTGGGGATGAGATATAGGTG  |
| ATF4    | Mouse   | Forward   | CCTGAACAGCGAAGTGTGG     |
|         |         | Reverse   | TGGAGAACCCATGAGGTTTCAA  |
| GAPDH   | Mouse   | Forward   | AGGTCGGTGTGAACGGATTTG   |
|         |         | Reverse   | GGGGTCGTTGATGGCAACA     |
| AREG    | Mouse   | Forward   | GGTCTTAGGCTCAGGCCATTA   |
|         |         | Reverse   | CGCTTATGGTGGAAACCTCTC   |
| EREG    | Mouse   | Forward   | TTGGGTCTTGACGCTGCTTT    |
|         |         | Reverse   | TGCATGATGGGATCACGGTTG   |
| Ptgs2   | Mouse   | Forward   | TTCCAATCCATGTCAAACCGT   |
|         |         | Reverse   | AGTCCGGGTACAGTCACACTT   |
| Sult1e1 | Mouse   | Forward   | ATGGAGACTTCTATGCCTGAGT  |
|         |         | Reverse   | ACACAACCTCACTAATCCAGGTG |
| Ptx3    | Mouse   | Forward   | CGCAGGTTGTGAAACAGCAAT   |
|         |         | Reverse   | GGGTTCCACTTTGTGCCATAAG  |
| Tnfaip6 | Mouse   | Forward   | CGTCTCGCAACCTACAAGCA    |
|         |         | Reverse   | GGTATCCGACTCTACCCTTGG   |
