# Supplementary material for: Metformin inhibits testosterone-induced endoplasmic reticulum stress in ovarian granulosa cells via inactivation of p38 MAPK
Source: PubMed Central journal article supplement — Hum Reprod. 2020 May 6;35(5):1145–58. doi: 10.1093/humrep/deaa077 (PMC7259369; doi:10.1093/humrep/deaa077), 2020-05-06
Supplement: deaa077_suppt2.pdf [file deaa077_suppt2.pdf]

**Supplementary Table SII** Serum hormone levels and body weights in different treatment groups of mice.

|                            | Control      | DHT                       | DHT + metformin           | Metformin    |
|----------------------------|--------------|---------------------------|---------------------------|--------------|
| Body weight (g)            | 18.51 ± 1.54 | 21.23 ± 2.01 <sup>a</sup> | 18.01 ± 1.53 <sup>b</sup> | 17.79 ± 1.81 |
| Total testosterone (ng/ml) | 7.59 ± 0.59  | 7.22 ± 0.94               | 7.01 ± 1.01               | 7.33 ± 1.29  |
| Progesterone (ng/ml)       | 4.12 ± 0.94  | 2.93 ± 1.02 <sup>a</sup>  | 3.67 ± 1.55               | 4.25 ± 0.98  |
| Oestradiol (pg/ml)         | 18.57 ± 5.77 | 21.83 ± 3.86              | 21.03 ± 4.91              | 20.33 ± 6.02 |
| DHT (ng/ml)                | 0.32 ± 0.07  | 1.32 ± 0.21 <sup>a</sup>  | 1.19 ± 0.13               | 0.40 ± 0.33  |

Data are presented as means ± SEMs (*n* = 20 per group)

<sup>a</sup>*P* < 0.05, compared between DHT and control groups;

<sup>b</sup>*P* < 0.05, compared between DHT + Met and DHT groups.

DHT, dihydrotestosterone.
